# Supplementary material
Source: PubMed Central journal article supplement (PMC6436660)
Supplement: fj.201802063RR.sf1.pdf [file fj.201802063RR.sf1.pdf]

## Online Figure 1

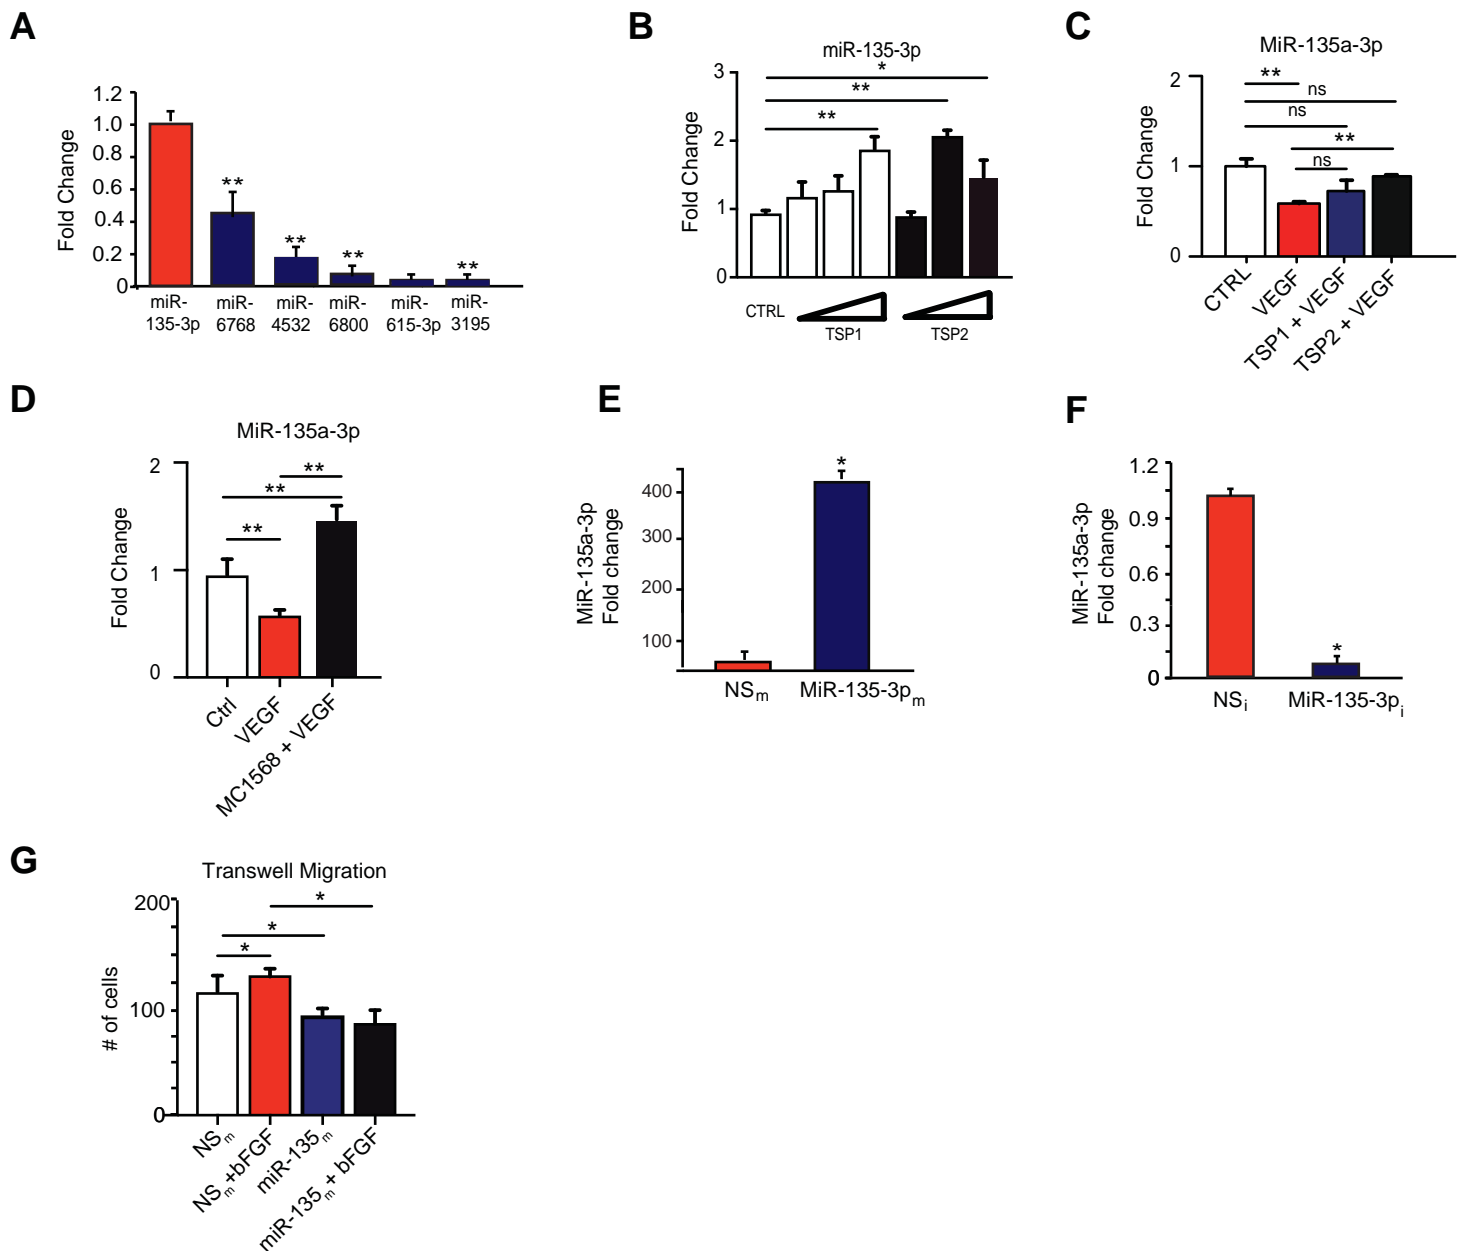

**Online Figure 1. MiR-135a-3p expression and function in ECs.** (A) MiR-135a-3p expression in ECs in comparison to other miRNAs by RT-qPCR. (B-D) HUVECs were stimulated with VEGF (50ng/ml), TSP1 (0.1, 1, 10 ug/ml respectively) or TSP2 (0.1, 1, 10 ug/ml respectively) or (C-D) costimulated with VEGF (50ng/ml), TSP1 (10ug/ml) or TSP2 (10ug/ml) for 12 hours (C), or prestimulated with MC1568 (10ng/ml) for 1 hr followed by VEGF (50ng/ml) stimulation (D). MiR-135-3p expression was analyzed by RT-qPCR. (E-F) HUVECs transfected with (E) miR negative control (NS<sub>m</sub>) or miR-135a-3p mimics (miR-135a-3p<sub>m</sub>) or (F) miR inhibitor negative control (NS<sub>i</sub>) or miR-135a-3p inhibitor (miR-135a-3p<sub>i</sub>) were subjected to RT-qPCR. (G) HUVECs transfected with NS<sub>m</sub> or miR-135-3p<sub>m</sub> were subjected to Transwell Boyden Chamber Assay with and without bFGF (50 ng/mL). ns, non-significant. All data represent mean ± s.e.m. \* P < 0.05 compared to controls, \*\* P < 0.01 compared to vehicle controls.

## Online Figure 2

**A**

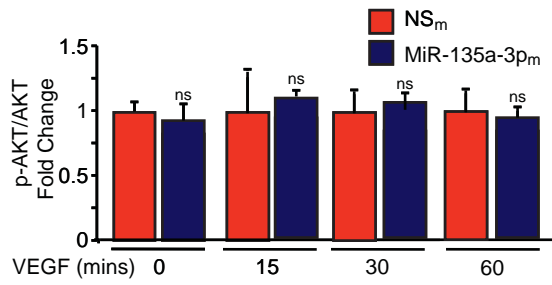

**B**

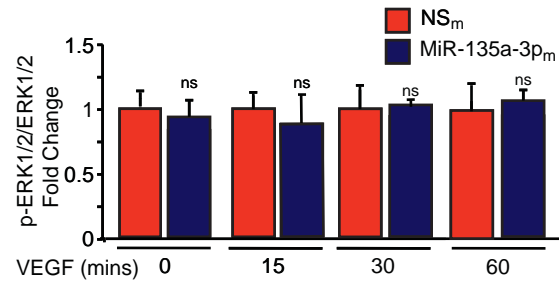

**C**

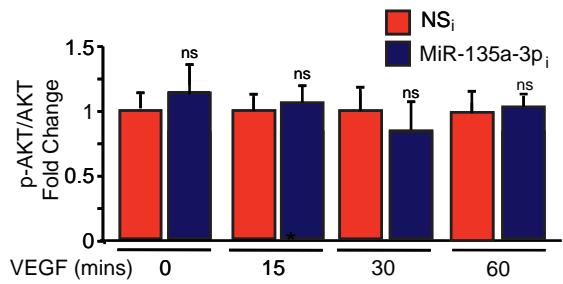

**D**

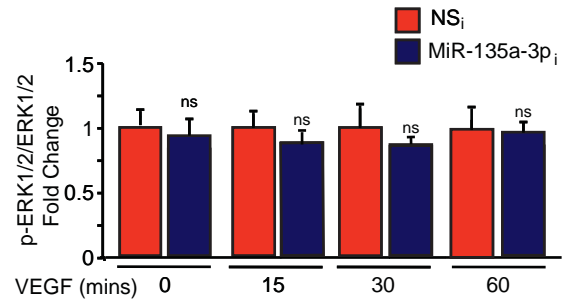

**Online Figure 2. MiR-135a-3p has no effect on AKT or ERK signaling in ECs.** HUVECs transfected with **(A-B)** miR negative control (NS<sub>m</sub>) or miR-135a-3p mimics (miR-135a-3p<sub>m</sub>) or **(C-D)** miR inhibitor negative control (NS<sub>i</sub>) or miR-135a-3p inhibitor (miR-135a-3p<sub>i</sub>) and treated with VEGF (50 ng/mL) were subjected to Western analysis using antibodies to p-AKT, AKT, p-ERK1/2, ERK1/2 and  $\beta$ -actin (n = 3 to 5 experiments). All data represent mean  $\pm$  s.e.m. \* P < 0.05 compared to controls.

## Online Figure 3

**A**

```
HIP1 3'UTR      TGCCCCAGGCTCTCGCTGCCCTGTG
(1636-1661)     : | | |      | | | | :      | | | | : | :
miR-135a-3p    GCGG-TGCCGAGG - - TTAGGGATA T
Deletion site   TGCCCCAGGCTCTCGCTGCCCTGTG
```

**B**

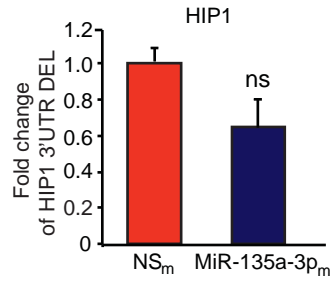

**Online Figure 3. MiR-135a-3p targets HIP1 in ECs. (A)** Binding sites in HIP1 3'UTR for miR-135-3p were predicted by rna22. The positions of binding sites are indicated as numbers in parentheses. Lines indicate perfect matches, while colons indicate G:U pairs. Nucleotides marked in red were deleted to generate deletion constructs (DEL) of 3'-untranslated region (UTR). **(B)** Luciferase activity of HIP1 3'-UTR deletion constructs (DEL-3'UTR) normalized to total protein was quantified in HUVECs transfected with NS<sub>m</sub> or miR-135a-3p<sub>m</sub> (n = 3 experiments). Deletion of miR-135a-3p binding site impaired miR-135a-3p's inhibitory effect on HIP1. 3'UTR. All data represent mean ± s.e.m. \* P < 0.05 compared to controls.

## Online Figure 4

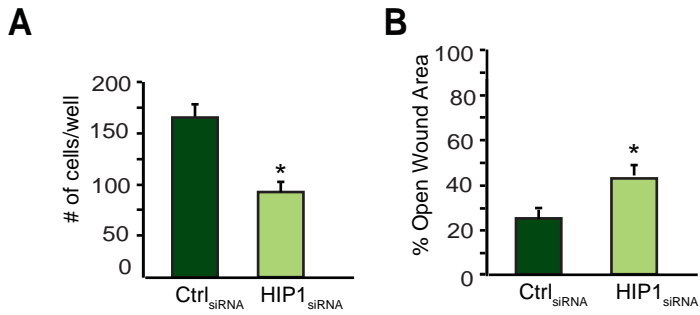

**Online Figure 4. siRNA-mediated knockdown of HIP1 reduces endothelial cell (EC) migration.** HUVECs were transfected with siRNA to HIP1 (A-B), or scrambled control (ctrl) siRNA. Migration of ECs were quantified by Boyden transwell chamber assay (A) or by scratch assay (B). \*P < 0.01. Results are representative of n = 3 replicates per group. All data represent means  $\pm$  s.e.m.

## Online Figure 5

**A**

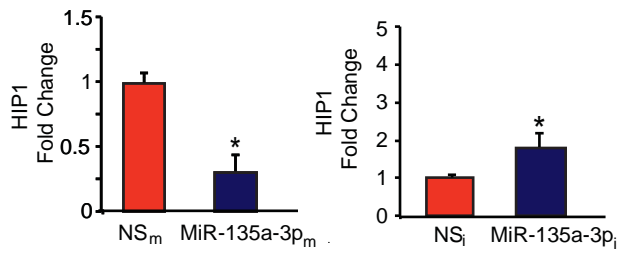

**B**

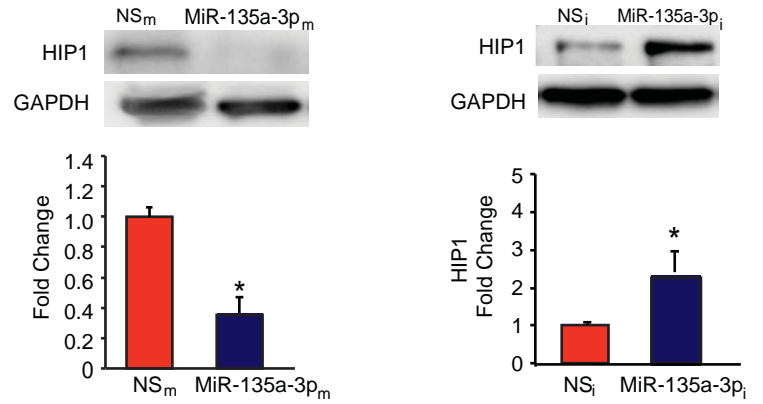

**Online Figure 5. Validation of miR-135-3p target HIP1 in human skin organoids.** Human skin organoids transfected with miR negative control (NS<sub>m</sub>), miR-135a-3p mimics (miR-135a-3p<sub>m</sub>), NS<sub>i</sub>, or miR-135a-3p<sub>i</sub> were subjected to RT-qPCR analyses for HIP1 (A) expression or Western blot analyses using antibody to HIP1 (B), and GAPDH (n = 3 experiments). \*P < 0.001; All data represent means ± s.e.m.

## Online Figure 6

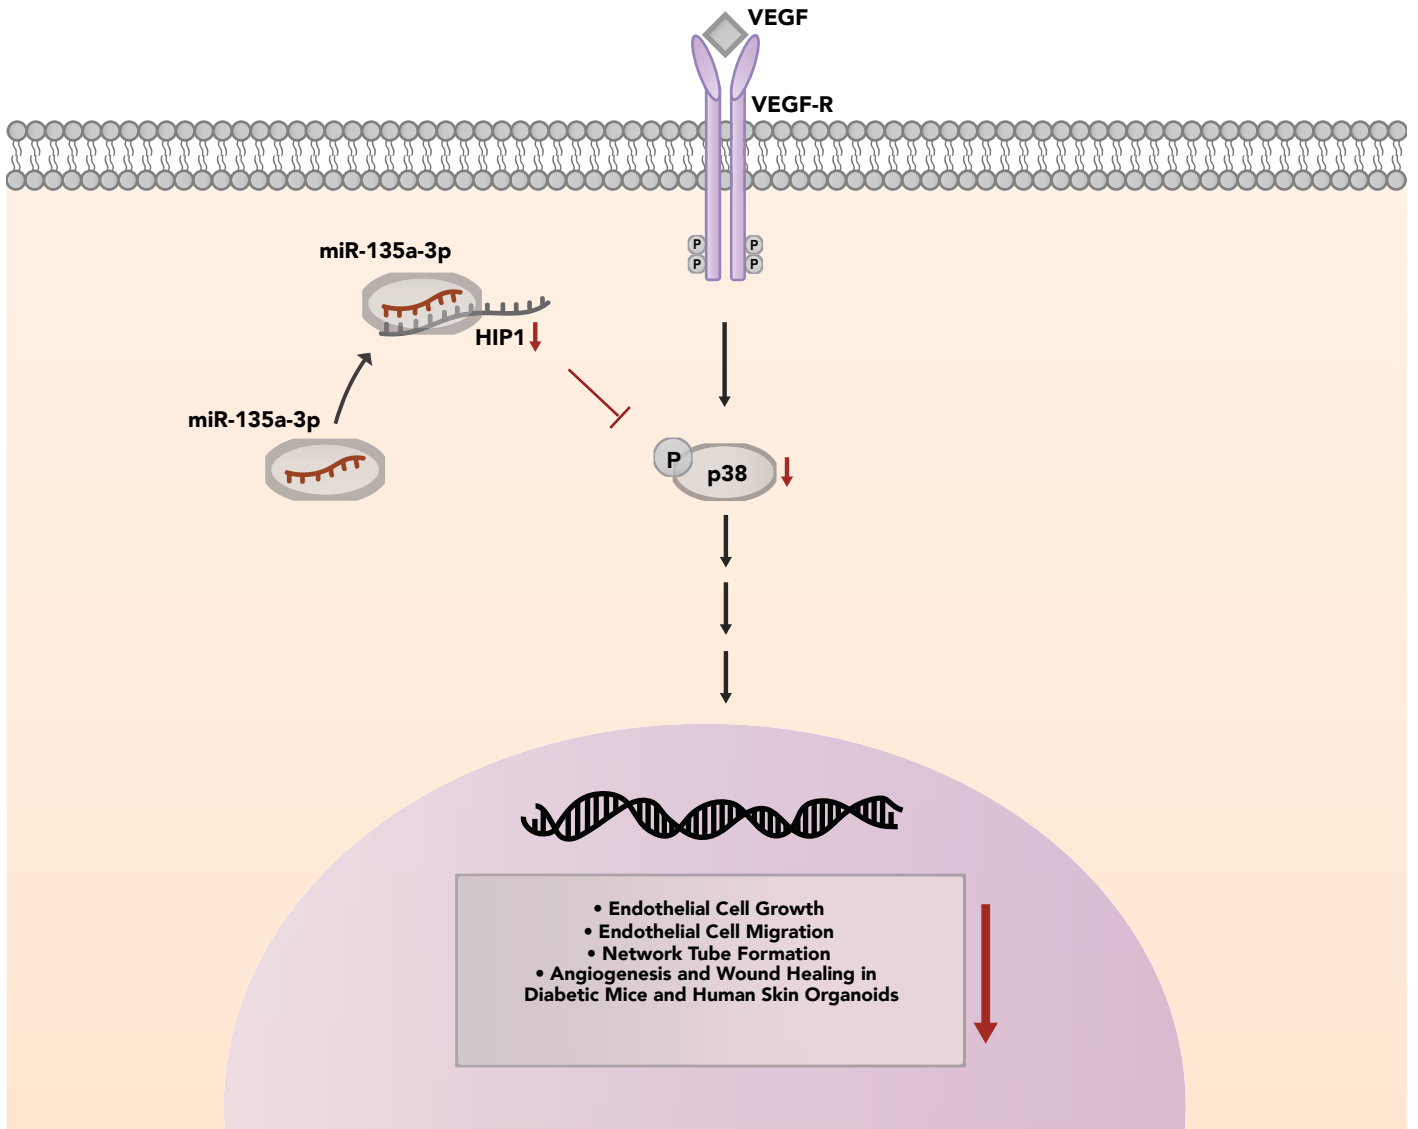

**Online Figure 6. MiR-135a-3p inhibits VEGF activation of p38 signaling by targeting HIP1 in endothelial cells (ECs).** Consequently, endothelial cell growth, migration, network tube formation, angiogenesis and wound healing in mouse and human skin models are significantly impaired.
